# Supplementary material for: Carbon fiber reinforced structural Zn-ion battery composites with enhanced mechanical properties and energy storage performance
Source: Royal Society of Chemistry journal article supplement (doi:10.1039/d2se01175a), 2022-01-01
Supplement: d2se01175a1.pdf [file d2se01175a1.pdf]

## Supporting information

### **Carbon Fiber Reinforced Structural Zn-ion Battery Composite with Enhanced Mechanical Properties and Energy Storage Performance**

Xu Liu <sup>a</sup>, Qigang Han <sup>a,b \*</sup>, Jincheng Han<sup>a</sup>, Qingxin Ma<sup>a</sup>, Chunguo Liu <sup>a \*</sup>

<sup>a</sup> Roll Forging Research Institute, School of Materials Science and Engineering (Key Laboratory of Automobile Materials, Ministry of Education), Jilin University, Changchun 130022, P.R. China

<sup>b</sup> State Key Laboratory of Automotive Simulation and Control, Jilin University, Changchun 130022, P.R. China

E-mail: hanqg@jlu.edu.cn; liucg@jlu.edu.cn

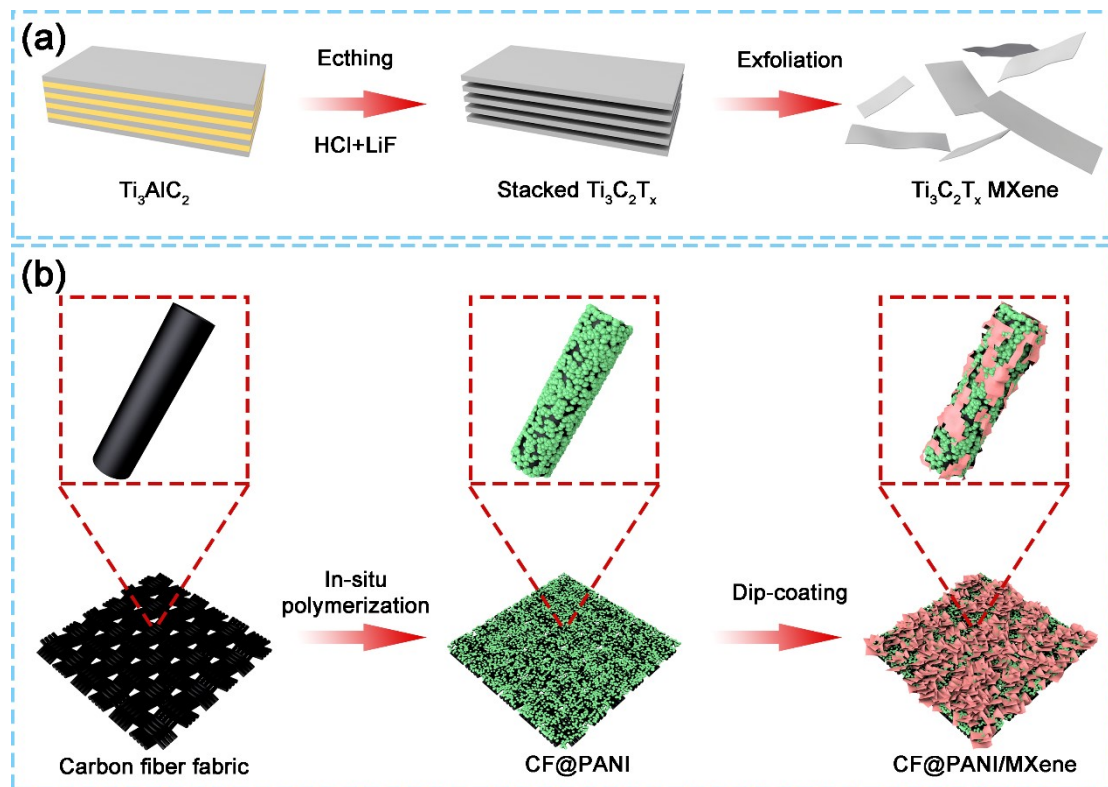

**Fig. S1.** (a) Schematic illustration of the synthesis of the  $Ti_3C_2M_x$ -MXene nanosheet. (b) Schematic illustration of the fabrication of the  $CF@PANI/Mxene$  structural electrode.

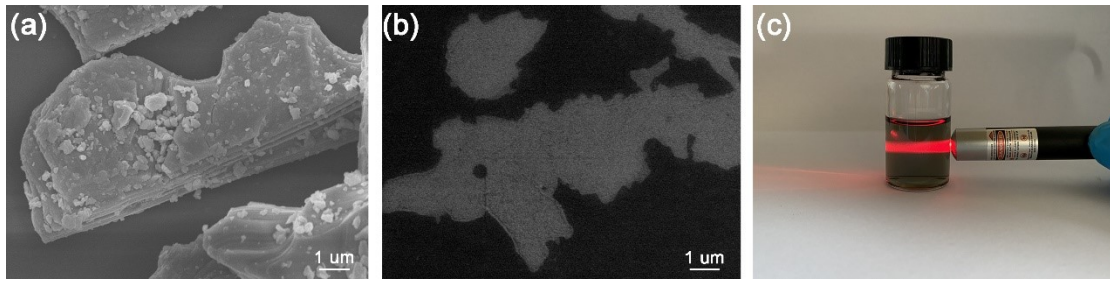

**Fig. S2.** (a) SEM image of the  $\text{Ti}_3\text{AlC}_2$ . (b) SEM image of  $\text{Ti}_3\text{C}_2$  MXene. (c) Tyndall effect produced by a few-layer/single-layer MXene solution.

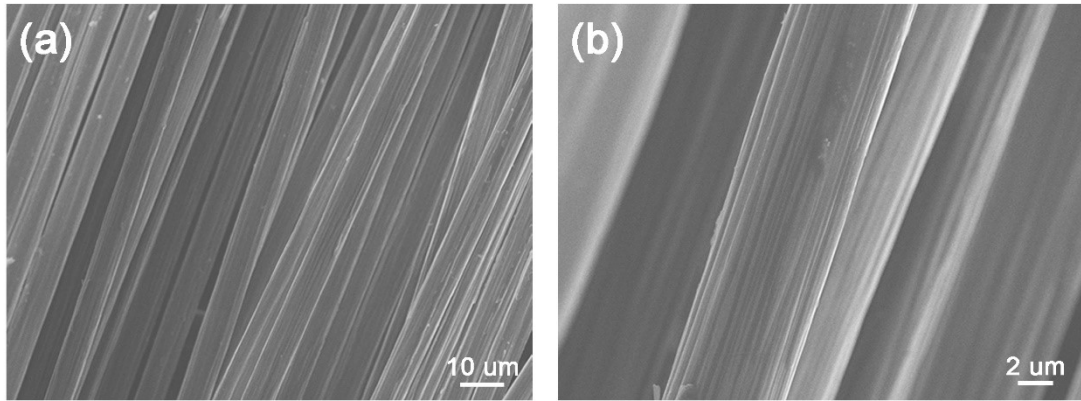

**Fig. S3.** (a) SEM image of carbon fiber.

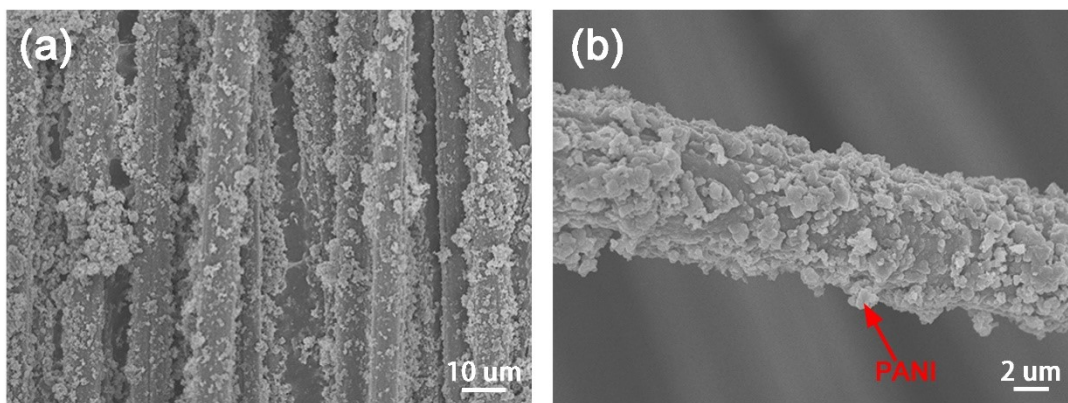

**Fig. S4.** (a) SEM image of CF@PANI.

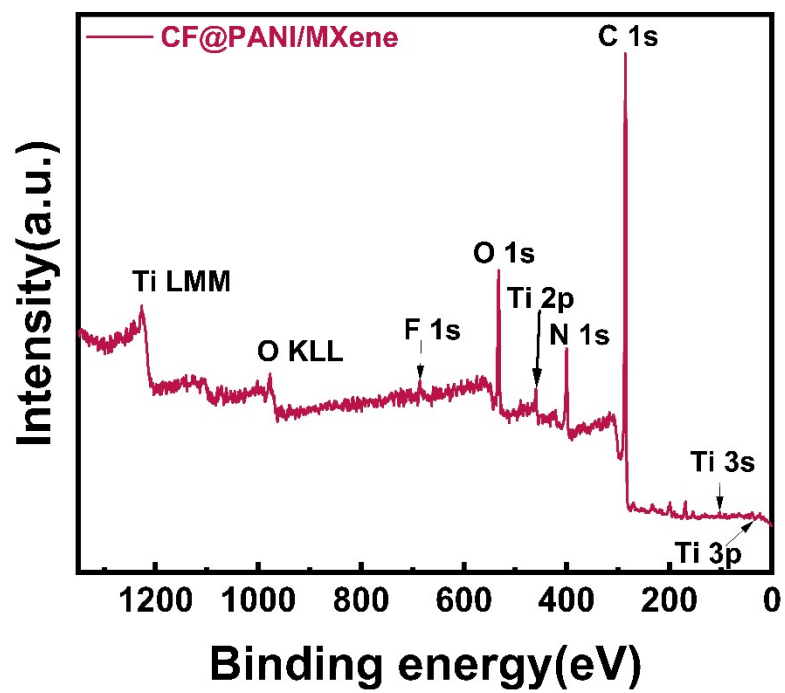

Fig. S5. (a) the XPS spectrums of CF@PANI/MXene.

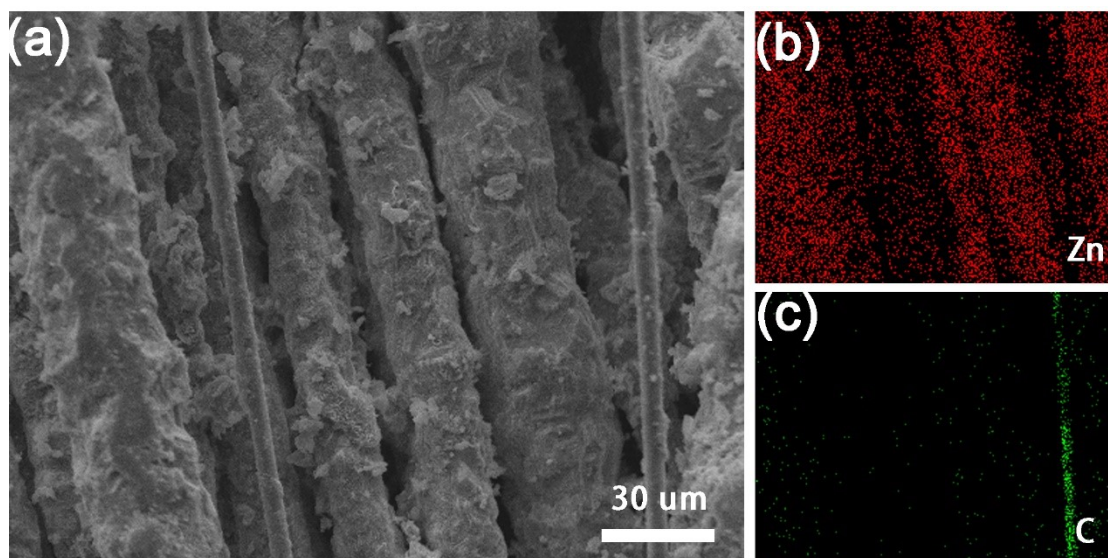

**Fig. S6.** (a) The SEM image of Zn deposited on carbon fiber. (b) and (c) Corresponding element mapping of Zn and C.

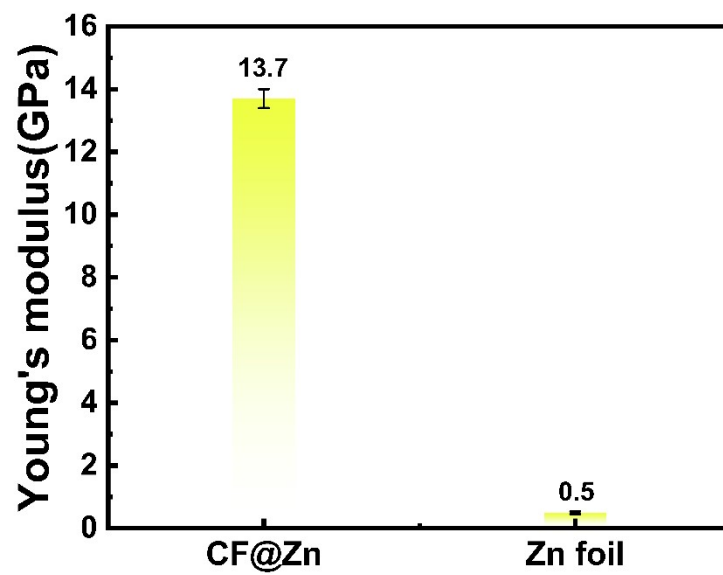

Fig. S7. (a) The Young's modulus of CF@Zn and Zn foil, respectively.



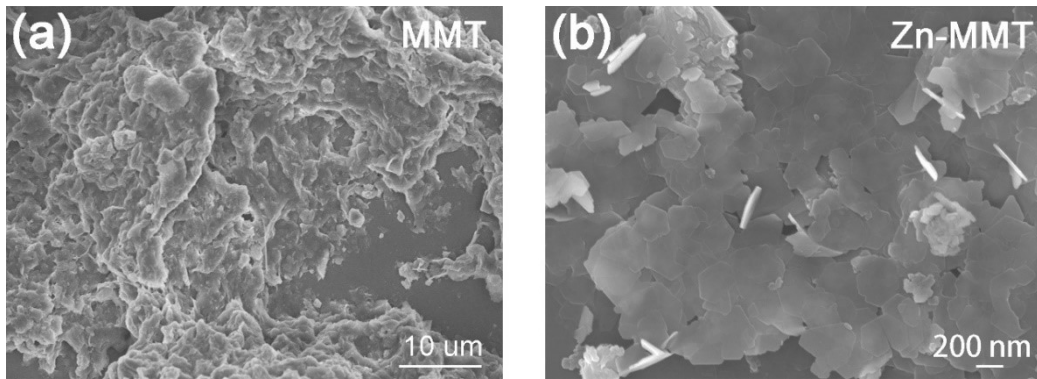

**Fig. S8.** (a) and (b) The SEM image of MMT and Zn-MMT, respectively.

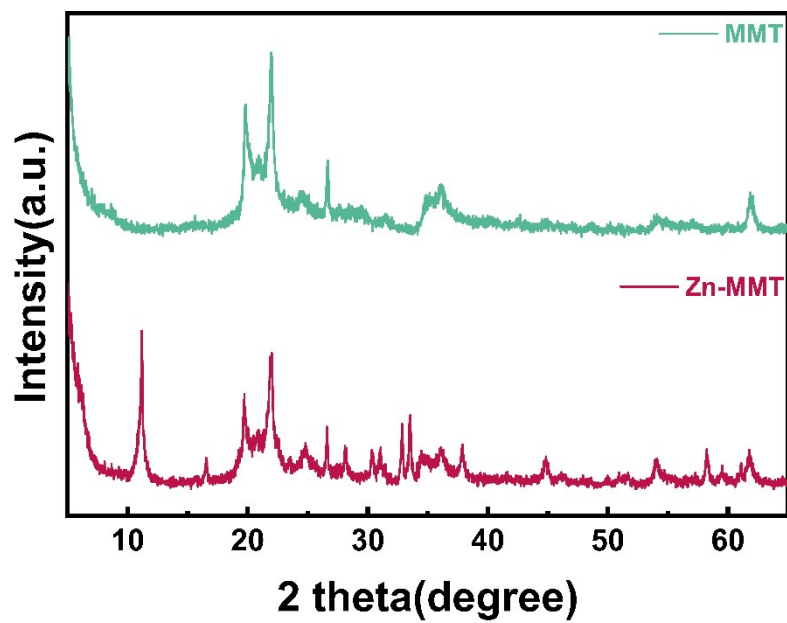

Fig. S9. (a) XRD patterns of MMT and Zn-MMT, respectively.

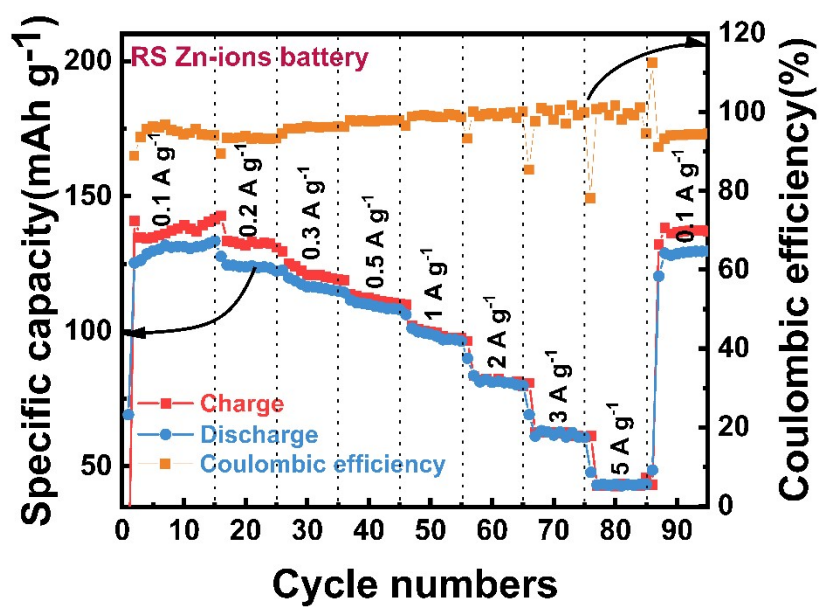

Fig. S10. The rate performance of regular structural Zn-ion battery.

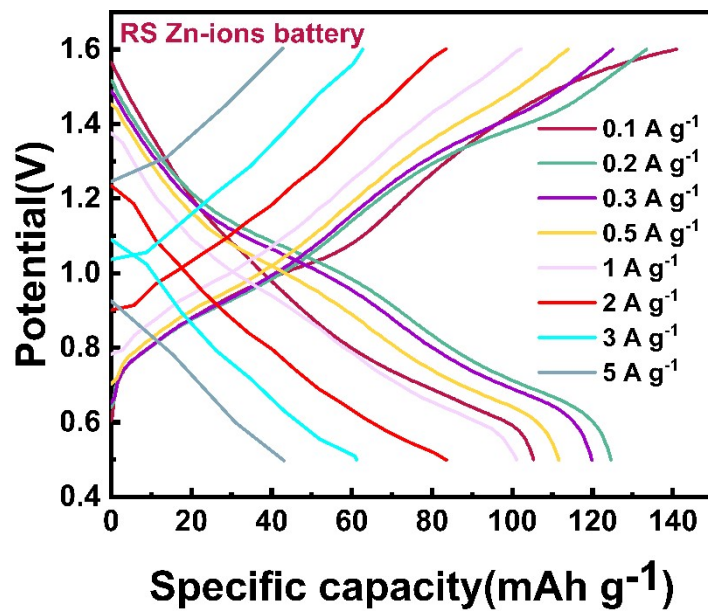

Fig. S11. Galvanostatic charge-discharge test at different current densities.

**Table S1.** The comparison of electrochemical performance between PC@Cu electrode and previously reported electrodes

| Materials                                      | Electrochemical performance                          |                          | Mechanical properties                   |                                 | Reference                                        |
|------------------------------------------------|------------------------------------------------------|--------------------------|-----------------------------------------|---------------------------------|--------------------------------------------------|
|                                                | Energy storage<br>(Wh kg <sup>-1</sup> )             | Cycling<br>performance   | Tensile strength and<br>Young's modulus | Bending strength and<br>modulus |                                                  |
| C1-100/0 (Li <sup>+</sup> )                    | 0.320±0.08                                           | /                        | 71.7±2.87 MPa and 14.7 GPa              | /                               | Mater. Res. Express 5<br>(2018) 055701[1]        |
| Zn/PZB-931/γ-MnO <sub>2</sub>                  | 123.4 mAhg <sup>-1</sup>                             | 90% after 100<br>cycles  | /                                       | /                               | ACS Nano 2019, 13,<br>1107–1115[2]               |
| PANI/BANF/CNT                                  | 128 ± 5 mAhg <sup>-1</sup>                           | 90% after 1000<br>cycles | 40 ± 4 MPa and<br>4 ± 0.5 GPa           | /                               | Nanoscale, 2020, 12,<br>16840–16850[3]           |
| CF GR LiTFSI in<br>EMIMBF <sub>4</sub>  CF LFP | ~30 mAh g <sup>-1</sup> (36<br>Wh kg <sup>-1</sup> ) | /                        | 213 MPa and ~1.8 MPa                    | /                               | Energy Storage Materials<br>24 (2020) 676–681[4] |
| PAN GR LFP                                     | 52 W h kg <sup>-1</sup>                              | 68% after 1000<br>cycles | /                                       | /                               | DOI:<br>10.1039/d0se00263a[5]                    |
| LSB                                            | 16 mAh g <sup>-1</sup>                               | 8% after 100<br>cycles   | 270.13 MPa and 28.54 GPa                | 55.18 MPa and 9.19 GPa          | Polymer Composites.<br>2020;1–11.[6]             |

|                                      |                                                           |                           |                         |                           |                                                               |
|--------------------------------------|-----------------------------------------------------------|---------------------------|-------------------------|---------------------------|---------------------------------------------------------------|
| Li/0.4 M LiBoB/0.6 M<br>LiTf/LiFePO4 | 23.6 W h kg <sup>-1</sup>                                 | 35 cycles                 | 163 MPa                 | /                         | Adv. Energy Sustainability<br>Res.2021,2, 2000093[7]          |
| graphite/LiNi0.5Mn0.3Co0.2O2         | 148.6 mAh g <sup>-1</sup>                                 | 95.5% after 500<br>cycles | /                       | Bending modulus is 3.1 GP | Adv. Energy Mater. 2021,<br>2100997[8]                        |
| Zn-MnO2                              | 145.9<br>mAh g <sup>-1</sup>                              | 88.3% after 500<br>cycles | 293 MPa<br>and 12.8 GPa | 180.8 MPa and 4.4 GPa     | Composites Science and<br>Technology 209 (2021)<br>108787[9]  |
| LiFePO4/Graphene oxide               | 93.3 mAh.g <sup>-1</sup><br>(222.14 Wh·kg <sup>-1</sup> ) | 88.1% after 500<br>cycles | /                       | /                         | Composites Science and<br>Technology 208 (2021)<br>108768[10] |
| ACF LATP-GF/PEO-LiTFSI Li            | 1.45 mAh cm <sup>-2</sup>                                 | 68% after 500<br>cycles   | 124.2 MPa               | 110 MPa                   | ACS Appl. Energy Mater.<br>2021, 4, 4038–4049[11]             |
| LFP/WCF                              | 114 mAhg <sup>-1</sup>                                    | 82% after 500<br>cycles   | /                       | /                         | Composite Structures 256<br>(2021) 112999                     |
| LFP/Carbon Fiber                     | 1.05 Wh L <sup>-1</sup>                                   | 10 cycles                 | 145 MPa and 0.289 GPa   | /                         | Manufacturing Letters 24<br>(2020) 1–5 [12]                   |
| Ni Hydroxide / Iron                  | 1.4 Wh kg <sup>-1</sup>                                   | /                         | 270 MPa and 7 GPa       | /                         | Nano Lett. 18, 7761–7768                                      |

|                     |                                                           |                           |                                      |                       |                |
|---------------------|-----------------------------------------------------------|---------------------------|--------------------------------------|-----------------------|----------------|
| Hydroxide           |                                                           |                           |                                      |                       | 267 (2018)[13] |
| RS Zn-ion batteries | 336.1 mAh g <sup>-1</sup><br>(235.6 Wh kg <sup>-1</sup> ) | 95.5% after 500<br>cycles | 194.6 ± 8.0 MPa and 9.6 ± 0.4<br>GPa | 268.0 MPa and 8.6 GPa | This work      |

---

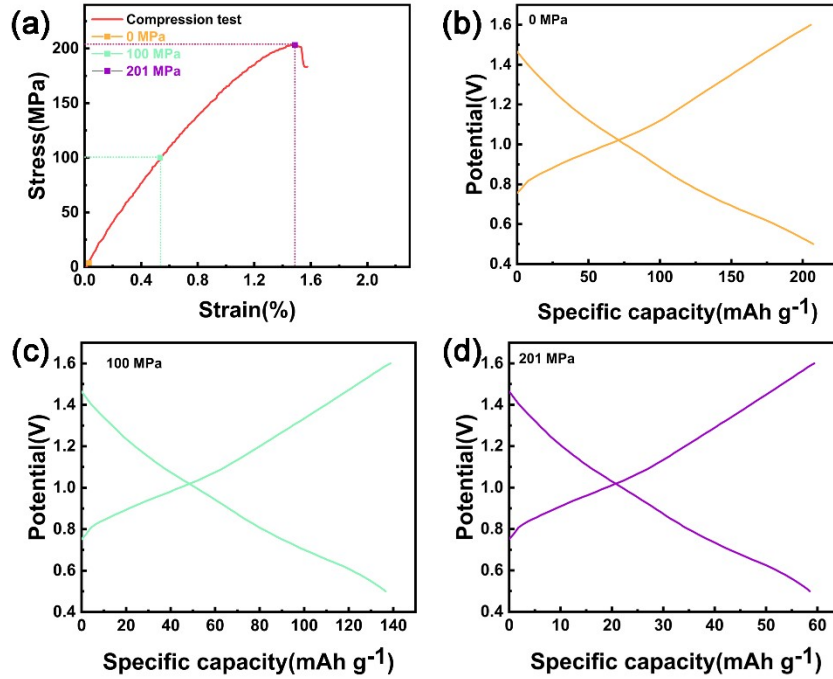

**Fig. S12** (a) The compression curve of in-situ electrochemical-mechanical performance of OS ZIB. (b) The voltage profiles at 0 MPa. (c)The voltage profiles at 100 MPa. (d)The voltage profiles at 201 MPa.

#### Reference

- [1] A. Javaid, M.Z. Ali, Multifunctional structural lithium ion batteries for electrical energy storage applications, *Mater. Res. Express* 5(5) (2018) 055701.
- [2] M. Wang, A. Emre, S. Tung, A. Gerber, D. Wang, Y. Huang, V. Cecen, N.A. Kotov, Biomimetic Solid-State Zn(2+) Electrolyte for Corrugated Structural Batteries, *ACS Nano* 13(2) (2019) 1107-1115.
- [3] P. Flouda, A.H. Quinn, A.G. Patel, D. Loufakis, D.C. Lagoudas, J.L. Lutkenhaus, Branched aramid nanofiber-polyaniline electrodes for structural energy storage, *Nanoscale* 12(32) (2020) 16840-16850.
- [4] K. Moyer, C. Meng, B. Marshall, O. Assal, J. Eaves, D. Perez, R. Karkkainen, L. Roberson, C.L. Pint, Carbon fiber reinforced structural lithium-ion battery composite: Multifunctional power integration for CubeSats, *Energy Storage Mater.* 24 (2020) 676-681.
- [5] K. Moyer, N.A. Boucherbil, M. Zohair, J. Eaves-Rathert, C.L. Pint, *Polymer*



reinforced carbon fiber interfaces for high energy density structural lithium-ion batteries, *Sustainable Energy Fuels* 4(6) (2020) 2661-2668.

[6] Y. Zhao, D. Zhao, T. Zhang, H. Li, B. Zhang, Z. Zhenchong, Preparation and multifunctional performance of carbon fiber-reinforced plastic composites for laminated structural batteries, *Polym. Compos.* 41(8) (2020) 3023-3033.

[7] L.E. Asp, K. Bouton, D. Carlstedt, S. Duan, R. Harnden, W. Johannisson, M. Johansen, M.K.G. Johansson, G. Lindbergh, F. Liu, K. Peuvot, L.M. Schneider, J. Xu, D. Zenkert, A Structural Battery and its Multifunctional Performance, *Adv. Energy Sustainability Res.* 2(3) (2021) 2000093.

[8] T. Jin, Y. Ma, Z. Xiong, X. Fan, Y. Luo, Z. Hui, X. Chen, Y. Yang, Bioinspired, Tree-Root-Like Interfacial Designs for Structural Batteries with Enhanced Mechanical Properties, *Adv. Energy Mater.* n/a(n/a) (2021) 2100997.

[9] J. Chen, Y. Zhou, M.S. Islam, X. Cheng, S.A. Brown, Z. Han, A.N. Rider, C.H. Wang, Carbon fiber reinforced Zn–MnO<sub>2</sub> structural composite batteries, *Compos. Sci. Technol.* 209 (2021) 108787.

[10] J.S. Sanchez, J. Xu, Z. Xia, J. Sun, L.E. Asp, V. Palermo, Electrophoretic coating of LiFePO<sub>4</sub>/Graphene oxide on carbon fibers as cathode electrodes for structural lithium ion batteries, *Compos. Sci. Technol.* 208 (2021) 108768.

[11] G.-H. Dong, Y.-Q. Mao, G.-M. Yang, Y.-Q. Li, S.-F. Song, C.-H. Xu, P. Huang, N. Hu, S.-Y. Fu, High-Strength Poly(ethylene oxide) Composite Electrolyte Reinforced with Glass Fiber and Ceramic Electrolyte Simultaneously for Structural Energy Storage, *ACS Appl. Energy Mater.* 4(4) (2021) 4038-4049.

[12] A. Thakur, X. Dong, Printing with 3D continuous carbon fiber multifunctional composites via UV-assisted coextrusion deposition, *Manuf. Lett.* 24 (2020) 1-5.

[13] C. Meng, N. Muralidharan, E. Teblum, K.E. Moyer, G.D. Nessim, C.L. Pint, Multifunctional Structural Ultrabattery Composite, *Nano Lett.* 18(12) (2018) 7761-7768.
